# Supplementary material for: Nuclear Magnetic Resonance Approaches in the Study of 2-Oxo Acid Dehydrogenase Multienzyme Complexes—A Literature Review
Source: MDPI journal article supplement (doi:10.3390/molecules181011873), 2013-09-26
Supplement: s1 [file s1]

**Domain structure of E2 component from *E. coli* pyruvate dehydrogenase complex**

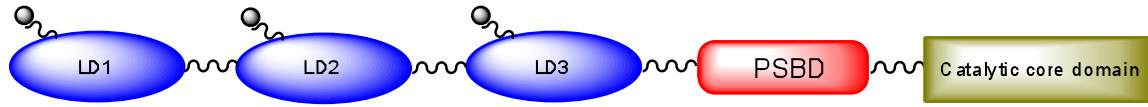

LD: Lipoyl Domain      PSBD: Peripheral Subunit Binding Domain

●~~~~ Lipoyllysine residue      ~~~~~ Inter domain linker
